# Supplementary material for: High-throughput sequencing of microbial community diversity in soil, grapes, leaves, grape juice and wine of grapevine from China
Source: PLoS One. 2018 Mar 22;13(3):e0193097. doi: 10.1371/journal.pone.0193097 (PMC5863948; doi:10.1371/journal.pone.0193097)
Supplement: S1 Table — (XLS) [file pone.0193097.s003.xls]

## Sheet: Sheet1
			Flora abundance index		Flora diversity index
	Sample Name	observed_species	shannon	simpson	chao1	ACE	goods_coverage
	P1	118	2.334	0.627	139.565	150.4	0.999
	P2	260	2.842	0.759	303.826	313.915	0.999
	T3	403	4.949	0.932	450.034	455.857	0.999
	T4	213	1.58	0.38	239.233	249.972	0.999
	T6	425	4.629	0.863	450.78	477.863	0.999
	T7	394	4.167	0.845	420.102	427.895	0.999
	T8	359	4.176	0.884	383.889	406.336	0.999
	T9	394	4.75	0.928	433.938	444.962	0.999
	Y1	244	2.942	0.728	273.319	287.23	0.999
	Y10	248	2.922	0.735	281.175	303.289	0.999
	Y11	181	2.309	0.646	207.464	210.745	0.999
	Y13	238	3.158	0.827	265.717	280.375	0.999
	Y15	269	2.62	0.659	303.759	324.394	0.999
	Y17	179	2.112	0.562	199.583	210.649	0.999
	Y5	250	3.01	0.766	304.022	320.771	0.999
	Y9	264	1.538	0.32	300.122	310.831	0.999
	Z1	158	3.395	0.846	237.688	228.215	0.999
