# Supplementary material for: High-throughput sequencing of microbial community diversity in soil, grapes, leaves, grape juice and wine of grapevine from China
Source: PLoS One. 2018 Mar 22;13(3):e0193097. doi: 10.1371/journal.pone.0193097 (PMC5863948; doi:10.1371/journal.pone.0193097)
Supplement: S2 Table — (XLS) [file pone.0193097.s004.xls]

## Sheet: Sheet1
	Sample Name	observed_species	shannon	simpson	chao1	ACE	goods_coverage
	J1	278	1.6	0.512	455.381	549.27	0.996
	P1	312	1.999	0.609	618.365	740.041	0.995
	P2	762	2.588	0.647	2133.62	1649.51	0.987
	T1	2191	8.827	0.993	2837.49	2894.7	0.981
	T3	2341	8.904	0.993	3028.04	2999.97	0.98
	T4	2168	8.88	0.994	2841.88	2812.05	0.981
	T5	2570	8.939	0.99	3421.86	3354.01	0.977
	T6	2119	8.349	0.982	2802.04	2710.26	0.982
	T7	2290	8.872	0.992	2941.09	2878.35	0.982
	T8	2166	8.799	0.992	2395.16	2535.02	0.986
	T9	2099	8.512	0.985	2296.49	2446.54	0.987
	Y1	1098	2.668	0.582	1684.83	1832.9	0.986
	Y10	410	1.239	0.276	640.577	717.694	0.994
	Y11	222	1.345	0.396	400.643	449.733	0.996
	Y13	363	1.757	0.573	540.119	579.914	0.995
	Y15	454	1.349	0.376	745.283	839.087	0.993
	Y17	105	1.168	0.439	173.9	215.926	0.998
	Y5	388	1.098	0.241	579.032	665.91	0.995
	Y9	913	1.796	0.303	1326.17	1524.26	0.988
	Z1	209	1.34	0.405	431.25	544.729	0.996
